# Supplementary material
Source: publisher figshare collection journal article supplement (https://rs.figshare.com/ndownloader/files/16838519)
Supplement: Supplementary file [file 16838519]

## Supplemental Document Table S2

**Table S2.** Sample size of high-quality recordings of individually identified Kaua'i 'amakihi, 'anianiau, and 'akeke'e during each time period.

| Species         | 1970s | Early 2000s | Present day |
|-----------------|-------|-------------|-------------|
| Kaua'i 'amakihi | 16    | 6           | 12          |
| 'anianiau       | 8     | 9           | 9           |
| 'akeke'e        | 1     | 12          | 13          |
